# Supplementary material
Source: Springer Nature journal article supplement (https://www.springermedizin.de/resource/supplementary/40248_2012_41_MOESM3_ESM.pdf/9686000)

normal lung

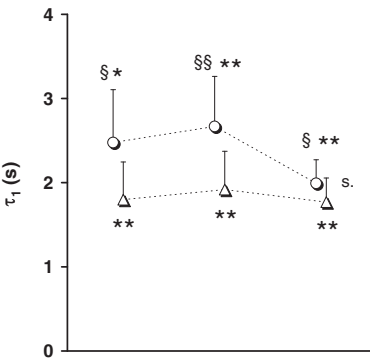

ARDS

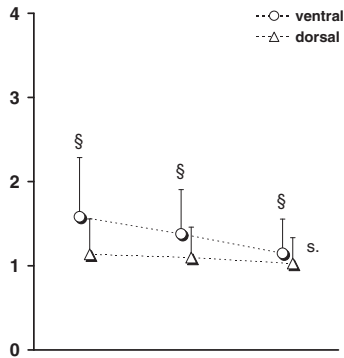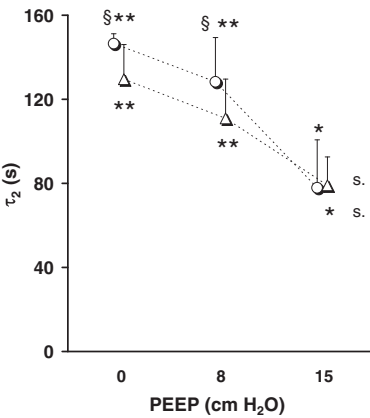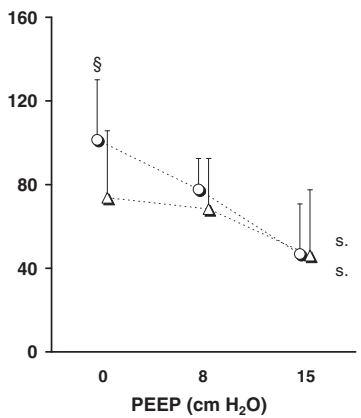

Supplement: MOESM3 [file 9686000]
